# Supplementary material for: Isotopic signature and nano-texture of cesium-rich micro-particles: Release of uranium and fission products from the Fukushima Daiichi Nuclear Power Plant
Source: Springer Nature journal article supplement (doi:10.1038/s41598-017-05910-z), 2017-07-10
Supplement: 41598_2017_5910_MOESM1_ESM.pdf [file 41598_2017_5910_MOESM1_ESM.pdf]

Supplementary Information for

**Isotopic signature and nano-texture of cesium-rich micro-particles: Release of uranium and fission products from the Fukushima Daiichi Nuclear Power Plant**

**Junpei Imoto <sup>1,\*\*</sup>, Asumi Ochiai <sup>1,\*\*</sup>, Genki Furuki <sup>1</sup>, Mizuki Suetake <sup>1</sup>, Ryohei Ikehara <sup>1</sup>, Kenji Horie <sup>2,3</sup>, Mami Takehara <sup>2</sup>, Shinya Yamasaki <sup>4</sup>, Kenji Nanba <sup>5</sup>, Toshihiko Ohnuki <sup>6</sup>, Gareth T. W. Law<sup>7</sup>, Bernd Grambow <sup>8</sup>, Rodney C. Ewing <sup>9</sup>,  
and Satoshi Utsunomiya <sup>1\*</sup>**

In *Scientific Reports* **7**, DOI:10.1038/s41598-017-05910-z

Table S1. Chemical composition of the OTZ3-1 and OTZ10 CsMPs determined by STEM-EDX area analysis.

|                     | SiO <sub>2</sub> | Cs <sub>2</sub> O | Fe <sub>2</sub> O <sub>3</sub> | ZnO  | Rb <sub>2</sub> O | K <sub>2</sub> O | SnO <sub>2</sub> | PbO  | MnO  | Cl   |
|---------------------|------------------|-------------------|--------------------------------|------|-------------------|------------------|------------------|------|------|------|
| OTZ3-1              |                  |                   |                                |      |                   |                  |                  |      |      |      |
| <i>High Cs zone</i> |                  |                   |                                |      |                   |                  |                  |      |      |      |
| Area1               | 48.0             | 29.6              | 9.15                           | 3.56 | 3.79              | 0.37             | 5.10             | 0.02 | 0.32 | 0.07 |
| Area2               | 51.1             | 28.9              | 9.68                           | 3.64 | 0.68              | 0.31             | 5.26             | 0.03 | 0.30 | 0.08 |
| Area3               | 58.0             | 19.2              | 10.4                           | 4.25 | 1.71              | 0.25             | 5.34             | 0.02 | 0.59 | 0.21 |
| Area4               | 59.5             | 16.8              | 10.3                           | 4.36 | 2.16              | 0.28             | 5.92             | 0.02 | 0.43 | 0.27 |
| Area5               | 62.6             | 13.7              | 10.3                           | 4.03 | 1.76              | 0.14             | 6.87             | 0.01 | 0.53 | 0.07 |
| Area6               | 59.6             | 29.9              | 8.16                           | 0.02 | 0.85              | 0.20             | 0.19             | 1.01 | 0.04 | 0.02 |
| Area7               | 62.6             | 15.3              | 11.3                           | 7.01 | 1.66              | 0.16             | 1.19             | 0.50 | 0.18 | 0.06 |
| <i>Low Cs zone</i>  |                  |                   |                                |      |                   |                  |                  |      |      |      |
| Area8               | 69.5             | 7.09              | 9.40                           | 5.14 | 1.23              | 0.26             | 6.02             | 0.36 | 0.44 | 0.59 |
| Area9               | 72.7             | 6.01              | 7.85                           | 4.86 | 1.04              | 0.34             | 5.67             | 0.40 | 0.48 | 0.64 |
| Area10              | 77.3             | 4.80              | 6.97                           | 5.66 | 0.74              | 0.19             | 3.03             | 0.38 | 0.37 | 0.55 |
| Area11              | 74.2             | 5.42              | 8.05                           | 4.65 | 0.99              | 0.24             | 5.02             | 0.26 | 0.53 | 0.62 |
| OTZ10               |                  |                   |                                |      |                   |                  |                  |      |      |      |
| Area1               | 57.1             | 8.18              | 16.2                           | 11.7 | 1.82              | 1.09             | 1.74             | 0.02 | 0.76 | 1.42 |
| Area2               | 55.4             | 7.79              | 16.5                           | 11.9 | 2.01              | 1.50             | 2.37             | 0.26 | 0.81 | 1.52 |
| Area3               | 54.3             | 7.16              | 18.2                           | 13.2 | 1.61              | 1.71             | 1.44             | 0.34 | 0.50 | 1.55 |
| Area4               | 55.7             | 9.92              | 15.5                           | 11.7 | 1.42              | 1.37             | 1.68             | 0.63 | 0.69 | 1.43 |
| Area5               | 54.1             | 8.16              | 17.0                           | 13.0 | 0.90              | 1.57             | 1.69             | 1.21 | 0.86 | 1.51 |
| Area6               | 59.9             | 7.64              | 16.4                           | 10.9 | 0.43              | 0.84             | 1.88             | 0.01 | 0.69 | 1.30 |
| Area7               | 61.6             | 7.17              | 15.7                           | 9.79 | 1.09              | 0.63             | 1.92             | 0.17 | 0.54 | 1.36 |
| Area8               | 56.1             | 7.77              | 16.4                           | 11.8 | 1.81              | 1.51             | 1.21             | 1.09 | 0.78 | 1.50 |
| Area9               | 54.1             | 7.19              | 17.6                           | 12.0 | 1.72              | 1.74             | 2.30             | 1.10 | 0.8  | 1.46 |
| Area10              | 55.4             | 6.88              | 17.2                           | 12.8 | 1.79              | 1.53             | 1.41             | 0.71 | 0.59 | 1.65 |
| Area11              | 56.8             | 8.65              | 16.1                           | 11.9 | 1.26              | 1.22             | 1.45             | 0.68 | 0.51 | 1.50 |

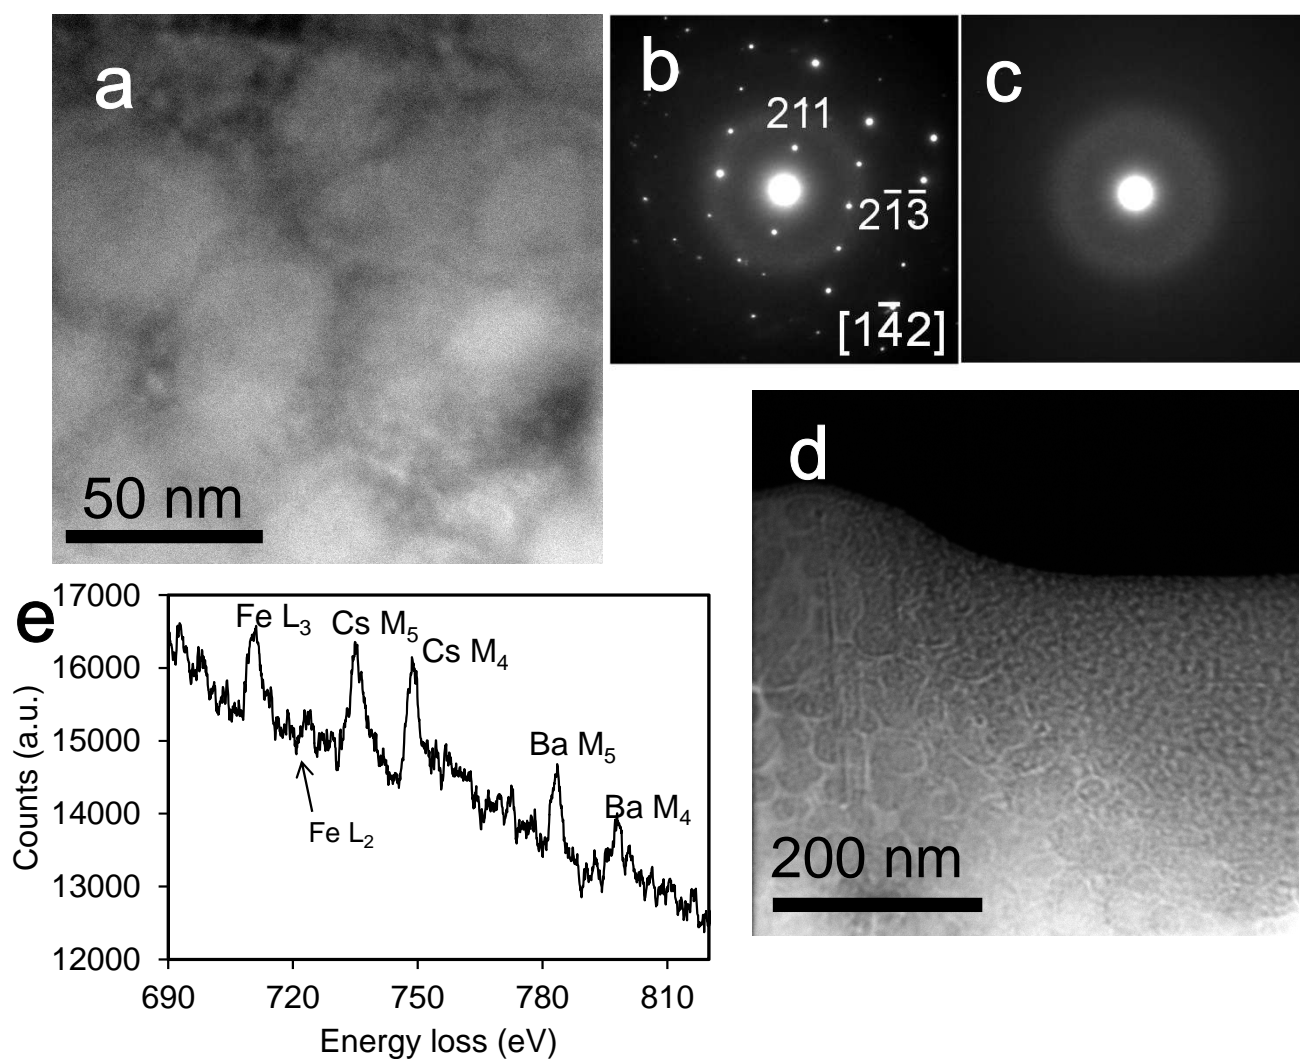

Figure S1. (a) HAADF-STEM image of the high Cs zone (represented by edx2 in Fig. 3b) in OTZ3-1 CsMP. (b) A SAED pattern of a large nanoparticle with high Cs content before amorphization by electron-beam irradiation. (c) A SAED pattern of a large nanoparticle with high Cs content after amorphization by electron-beam irradiation. (d) HAADF-STEM image of the boundary between high and low Cs zones (Fig. 3b) after amorphization by electron-beam irradiation. (e) Electron energy-loss spectroscopy of a high Cs zone.

Figure S1

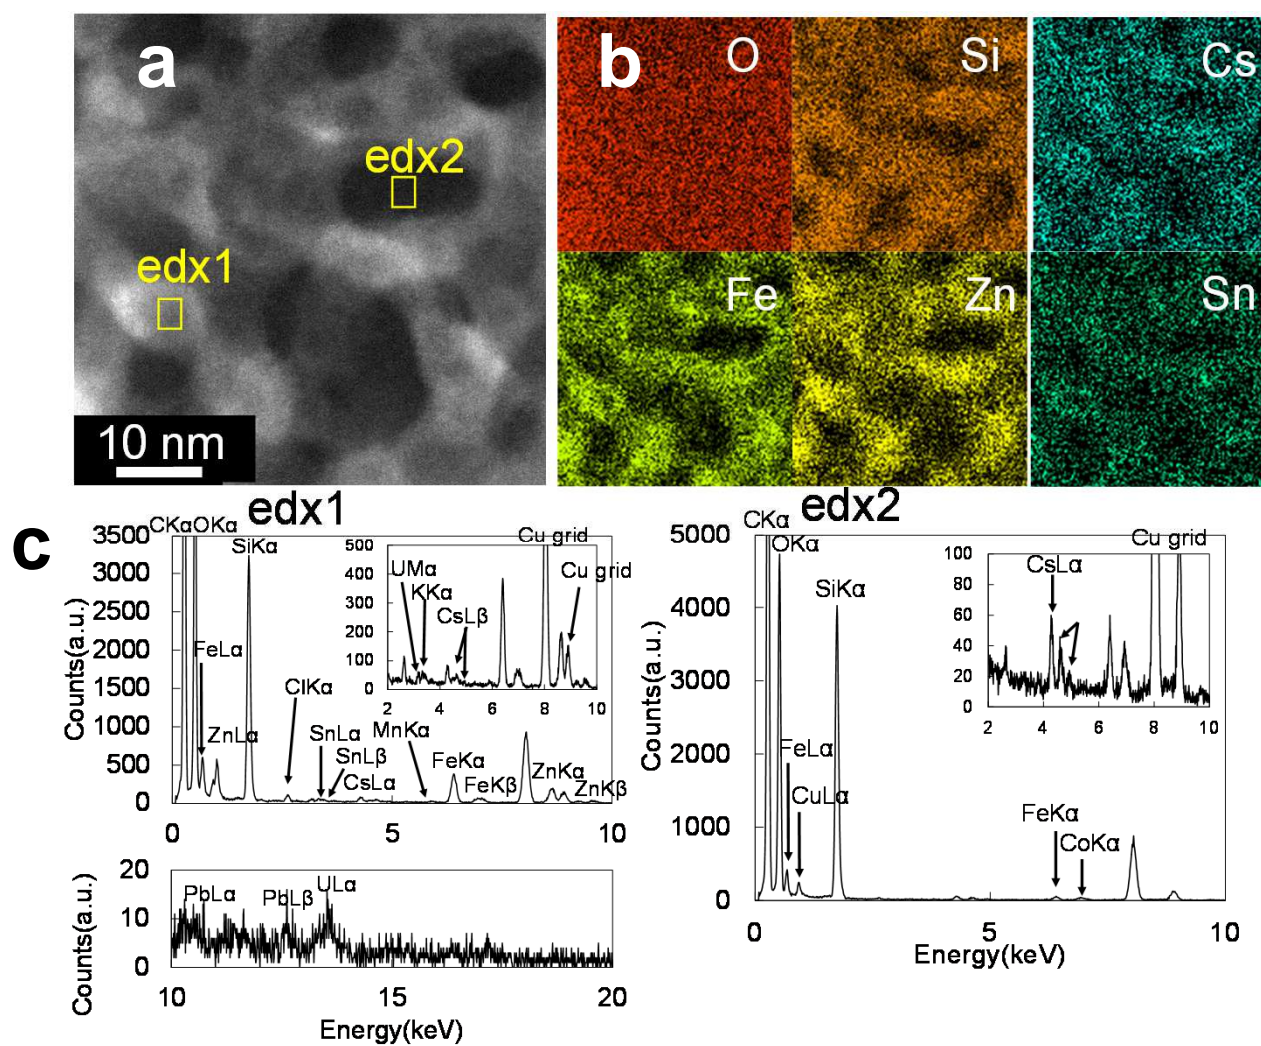

Figure S2. (a) HAADF-STEM image the OTZ10 CsMP. (b) Elemental maps of the major constituents for (a). (c) EDX spectra of the portion indicated by edx1 and edx2 in (a).

Figure S2
